# Supplementary material for: Long noncoding RNA GAPLINC promotes invasion in colorectal cancer by targeting SNAI2 through binding with PSF and NONO
Source: PubMed Central journal article supplement (PMC5173126; doi:10.18632/oncotarget.9741), 2016-05-31
Supplement: oncotarget-07-42183-s001.pdf [file oncotarget-07-42183-s001.pdf]

## Long noncoding RNA GAPLINC promotes invasion in colorectal cancer by targeting SNAI2 through binding with PSF and NONO

### SUPPLEMENTARY FIGURE AND TABLES

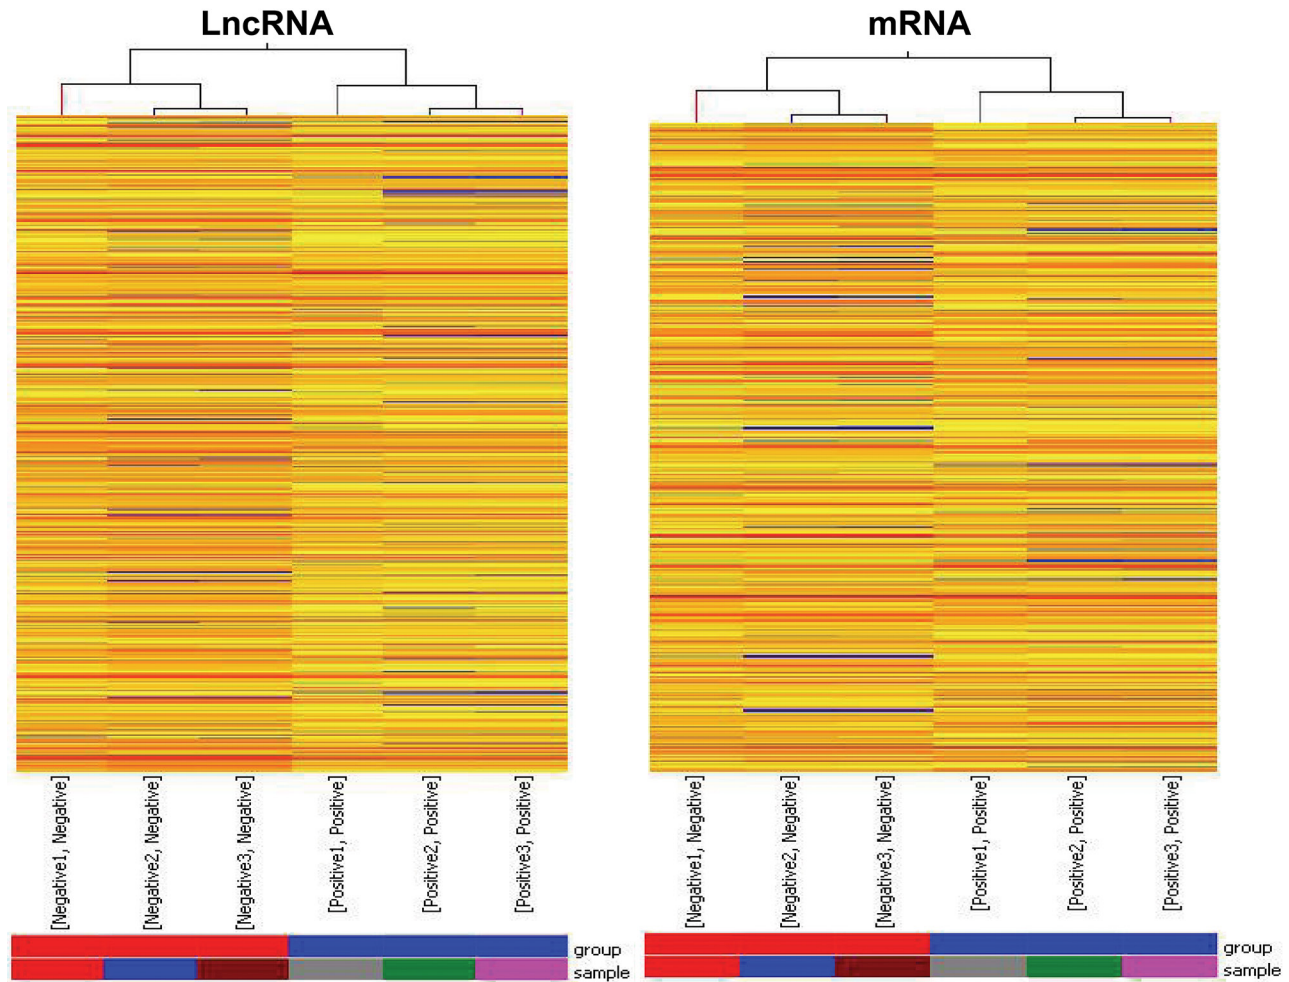

**Supplementary Figure S1: Hierarchical clustering showing the differentially expressed lncRNAs and mRNAs in MLNs versus NLNs.** Red indicates an increase and blue indicates low relative expression. Data represent mean  $\pm$  standard deviation from three independent experiments. \* $P < 0.05$ , \*\* $P < 0.01$ .

Supplementary Table S1: Sequences information of the primers and siRNAs

| Genes                 | Forward primer (5'-3')   | Reverse primer (5'-3')   |
|-----------------------|--------------------------|--------------------------|
| <i>GAPLINC</i>        | ACACACAGCAGCCTGGTTTC     | ATGGCACAATCAGGGCTCTT     |
| <i>PSF</i>            | CAAGATCTGATGAGACGCCAGGAA | CCATCTCACGTTGGCGAATCATCA |
| <i>NONO</i>           | TCGGATGGGTCAGATGGCTA     | CGGTTGAATGCAGGAGGAGT     |
| <i>LAMB3</i>          | GCCACATTCTACTCGGTGA      | CCAAGCCTGAGACCTACTGC     |
| <i>SNAI2</i>          | TGGTTGCTTCAAGGACACAT     | GTTGCAGTGAGGGCAAGAA      |
| <i>IGFBP7</i>         | CACTGGTGCCCAGGTGTACT     | TTGGATGCATGGCACTCATAT    |
| <i>GAPDH</i>          | GCACCGTCAAGGCTGAGAAC     | GGATCTCGCTCCTGGAAGATG    |
| <i>GAPLINC-siRNA1</i> | GCCAUCUCCAUAACAUAUAATT   | UUUAUGUUUAUGGAGAUGGCTT   |
| <i>GAPLINC-siRNA2</i> | GCACUUAGAAGAACCAAUATT    | UAUUGGUUCUUCUAAGUGCTT    |
| <i>PSF-siRNA</i>      | CUUUCUGUUCGUAUAUCUUUCA   | AAAGAUUACGAACAGAAAGGG    |
| <i>NONO-siRNA</i>     | GGGGUGGUAAUAAACAAGUCA    | ACUUGUUUAAUACCACCCUC     |

Supplementary Table S2: Pathway prediction using KEGG terms

| Pathway ID    | List of hits | P value  | Pathway description                              |
|---------------|--------------|----------|--------------------------------------------------|
| path:hsa05166 | 44           | 0.022717 | Human T-cell lymphotropic virus I infection      |
| path:hsa04932 | 35           | 0.000179 | Nonalcoholic fatty liver disease                 |
| path:hsa04015 | 35           | 0.047893 | Rap1 signaling pathway                           |
| path:hsa04062 | 33           | 0.028422 | Chemokine signaling pathway                      |
| path:hsa03010 | 29           | 0.001971 | Ribosome                                         |
| path:hsa04514 | 29           | 0.006545 | Cell adhesion molecules                          |
| path:hsa04310 | 26           | 0.022235 | Wnt signaling pathway                            |
| path:hsa04660 | 25           | 0.000829 | T-cell receptor signaling pathway                |
| path:hsa04360 | 24           | 0.024384 | Axon guidance                                    |
| path:hsa04662 | 21           | 0.000127 | B-cell receptor signaling pathway                |
| path:hsa04640 | 21           | 0.002316 | Hematopoietic cell lineage                       |
| path:hsa04064 | 20           | 0.007803 | NF-kappa B signaling pathway                     |
| path:hsa04664 | 17           | 0.004824 | Fc epsilon RI signaling pathway                  |
| path:hsa04520 | 17           | 0.007545 | Adherens junction                                |
| path:hsa04612 | 17           | 0.016624 | Antigen processing and presentation              |
| path:hsa05210 | 14           | 0.018984 | Colorectal cancer                                |
| path:hsa05221 | 13           | 0.02154  | Acute myeloid leukemia                           |
| path:hsa05213 | 12           | 0.02442  | Endometrial cancer                               |
| path:hsa03410 | 10           | 0.005552 | Base excision repair                             |
| path:hsa04962 | 10           | 0.048117 | Vasopressin-regulated water reabsorption         |
| path:hsa00563 | 7            | 0.029704 | Glycosylphosphatidylinositol-anchor biosynthesis |
| path:hsa00511 | 6            | 0.018586 | Other glycan degradation                         |

Supplementary Table S3: Proteins by GAPLINC pull-down and mass spectrometry analysis in HCT116

| Hits | Protein mass (Da) | Protein description                                                                            | Protein score |
|------|-------------------|------------------------------------------------------------------------------------------------|---------------|
| 1    | 76216             | Splicing factor, proline- and glutamine-rich<br>OS= <i>Homo sapiens</i> GN=SFPQ PE=1 SV=2      | 978           |
| 2    | 59020             | Keratin, type I cytoskeletal 10 OS= <i>Homo sapiens</i> GN=KRT10 PE=1 SV=6                     | 865           |
| 3    | 54311             | Non-POU domain-containing octamer-binding protein OS= <i>Homo sapiens</i> GN=NONO PE=1 SV=4    | 854           |
| 4    | 66170             | Keratin, type II cytoskeletal 1 OS= <i>Homo sapiens</i> GN=KRT1 PE=1 SV=6                      | 783           |
| 5    | 65678             | Keratin, type II cytoskeletal 2 epidermal OS= <i>Homo sapiens</i> GN=KRT2 PE=1 SV=2            | 451           |
| 6    | 62255             | Keratin, type I cytoskeletal 9 OS= <i>Homo sapiens</i> GN=KRT9 PE=1 SV=3                       | 303           |
| 7    | 51872             | Keratin, type I cytoskeletal 14 OS= <i>Homo sapiens</i> GN=KRT14 PE=1 SV=4                     | 219           |
| 8    | 32060             | Voltage-dependent anion-selective channel protein 2 OS= <i>Homo sapiens</i> GN=VDAC2 PE=1 SV=2 | 184           |
| 9    | 51163             | Keratin, type I cytoskeletal 28 OS= <i>Homo sapiens</i> GN=KRT28 PE=1 SV=2                     | 164           |
| 10   | 50788             | Tubulin alpha-1A chain OS= <i>Homo sapiens</i> GN=TUBA1A PE=1 SV=1                             | 159           |
| 11   | 60315             | Keratin, type II cytoskeletal 6B OS= <i>Homo sapiens</i> GN=KRT6B PE=1 SV=5                    | 158           |
| 12   | 48361             | Keratin, type I cytoskeletal 17 OS= <i>Homo sapiens</i> GN=KRT17 PE=1 SV=2                     | 140           |
| 13   | 95842             | A-kinase anchor protein 4 OS= <i>Homo sapiens</i> GN=AKAP4 PE=1 SV=1                           | 119           |
| 14   | 50095             | Tubulin beta chain OS= <i>Homo sapiens</i> GN=TUBB PE=1 SV=2                                   | 117           |
